# Supplementary material for: A Dual-Transformable MgGa-MOF Nanoplatform for HCC Therapy via Lactate Metabolism Blockade and Immune Reactivation
Source: Research Square preprint supplement (doi:10.21203/rs.3.rs-8600293/v1), 2026-01-29
Supplement: Supplementary file 1 [file bc9aab74f8bb36e044466bd4.docx]

Supplementary Information

A Dual-Transformable MgGa-MOF Nanoplatform for HCC Therapy via Lactate Metabolism Blockade and Immune Reactivation

Supplementary Figures
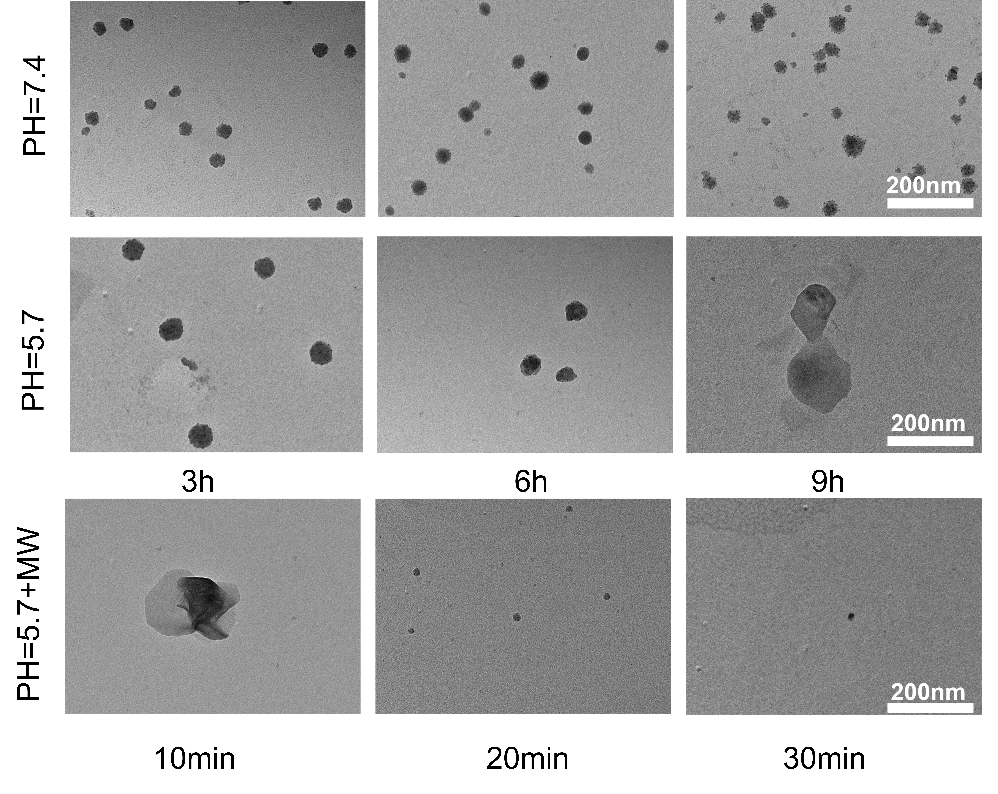


Figure S1. Stability Evaluation of Mg-Ga-MOF under Various Conditions.


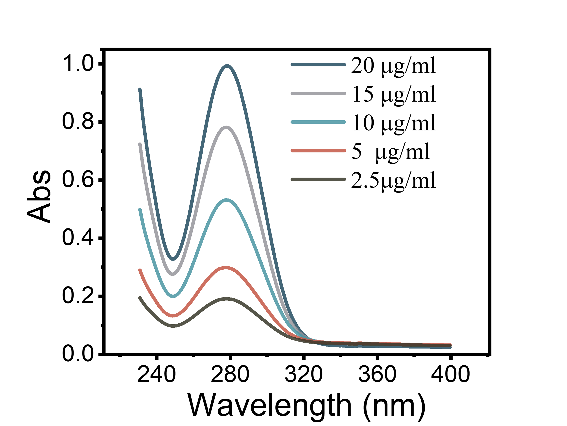

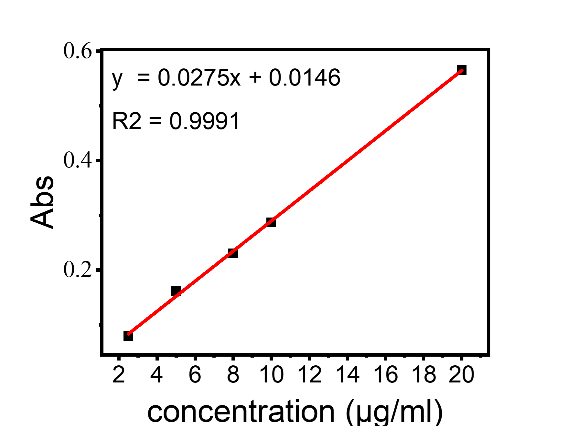


b

a

Figure S2. (a) UV Absorption Curves of Diclofenac Sodium at Different Concentrations, (b) UV Absorption Standard Curve of Diclofenac Sodium.


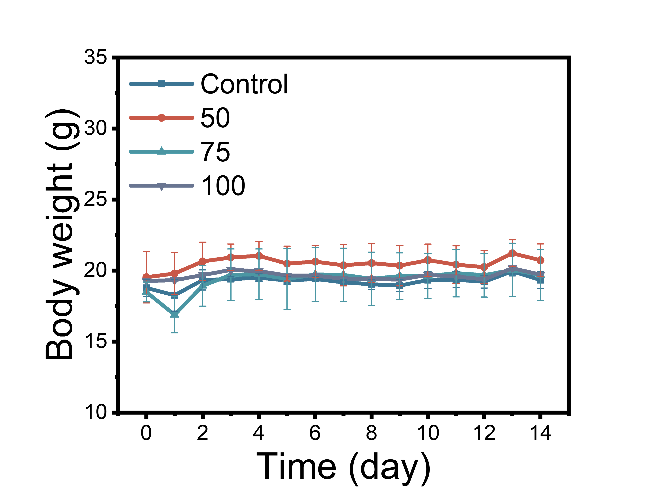


a

b


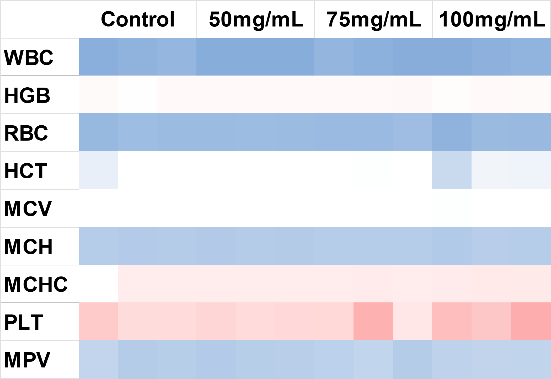


Figure S3. (a, b) In vivo acute toxicity evaluation in mice, including body weight monitoring and hematological analysis. (n=4)


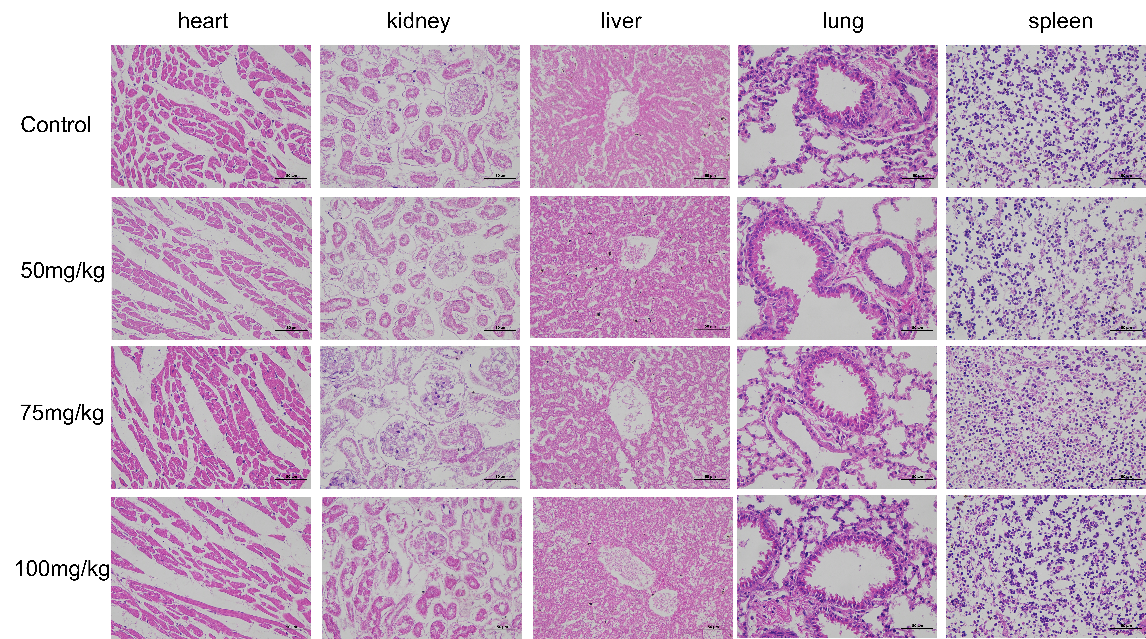


Figure S4. In vivo acute toxicity evaluation in mice by H&E staining of major organs. (scales bar: 50μm)


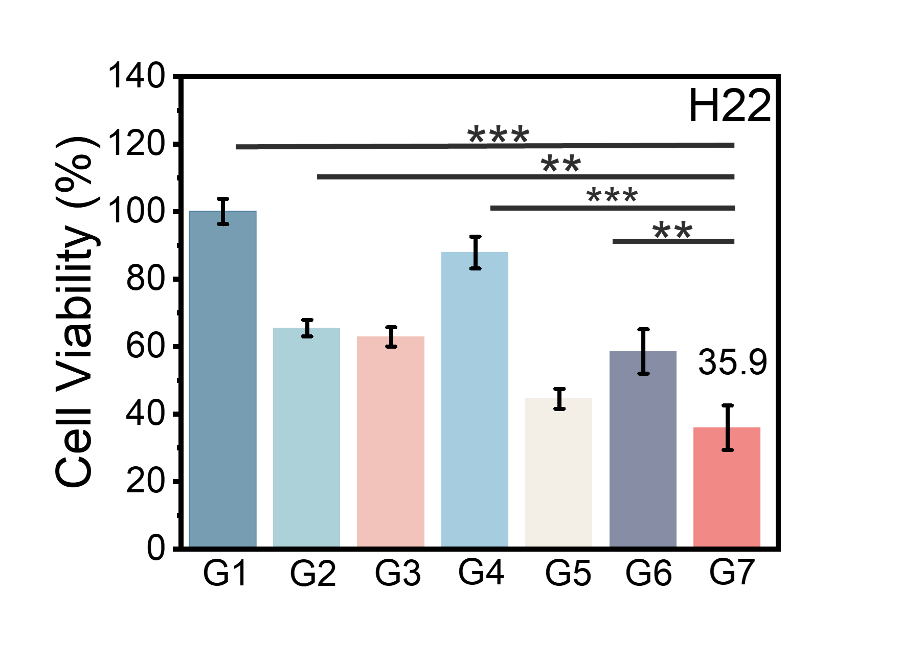


Figure S5. Cellular Therapeutic Evaluation of DMGTF against H22 Cells. The

mean ± standard deviation (SD) data are presented, with n>3, *p<0.5, **p<0.01 and ***p<0.001.


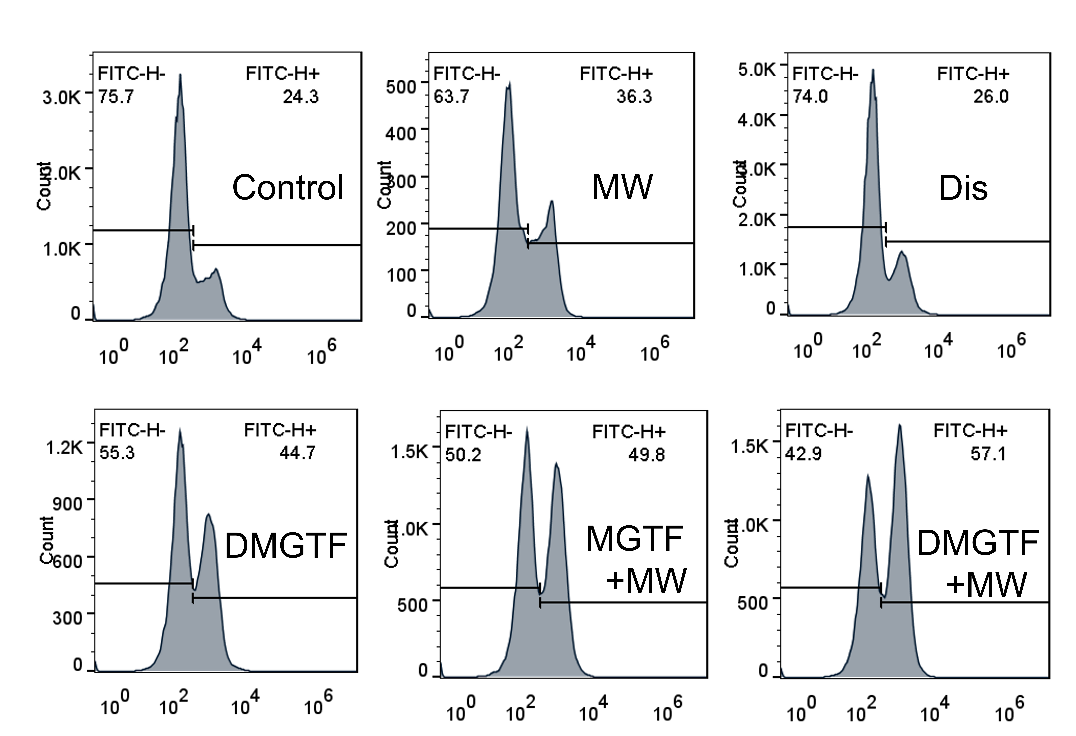


Figure S6. Co-incubation of HepG2 and CTLL-2 Cells: Stimulatory Effect of DMGTF on CD69 Secretion by CTLL-2. (n=3)


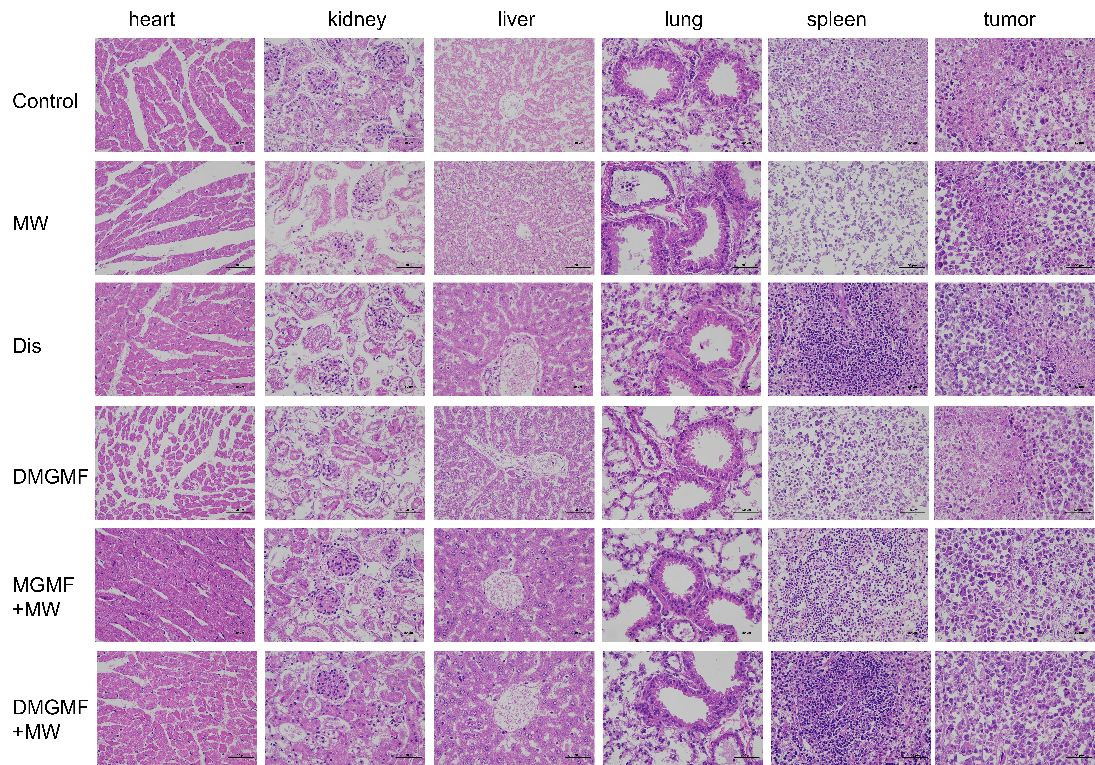


Figure S7. H&E staining of major organs (heart, liver, spleen, lung, kidney, and tumor) in mice after different treatments. (scales bar: 50μm)
